# Supplementary material for: The Evaluation of the Four-Chamber Cardiac Dissection Method of the Fetal Heart as an Alternative to Conventional Inflow–Outflow Dissection in Small Gestational-Age Fetuses
Source: MDPI journal article supplement (doi:10.3390/diagnostics12010223), 2022-01-17
Supplement: s1 [file s1]

# Supplementary Materials

**Supplementary Table S1.** Description of acquisition parameters adapted to the characteristics and size of each case - on the sagittal section.

| Num-ber Case | Effective Echo Time (TE) (ms) | Repetition Time (TR) (ms) | Slice Thickness (mm) | Field of View (mm) | Matrix (Data Points) | Resolution (cm/pixel) | Number of Slices Acquired | Scanning Time (min) |
|--------------|-------------------------------|---------------------------|----------------------|--------------------|----------------------|-----------------------|---------------------------|---------------------|
| 1            | 36                            | 7714.4                    | 0.5/075              | 4.9                | 384/384              | 0.0154/0.0149         | 59                        | 30                  |
| 2            | 36                            | 4747.3                    | 0.5/075              | 4.1                | 384/384              | 0.0107/0.0104         | 38                        | 18                  |
| 3            | 36                            | 5934.1                    | 05/075               | 4.73               | 384/384              | 0.0123/0.0121         | 48                        | 23                  |
| 4            | 36                            | 6527.6                    | 05/075               | 6                  | 384/384              | 0.0156/0.0131         | 52                        | 26                  |
| 5            | 36                            | 5696.8                    | 0.6/0.85             | 4.75               | 384/384              | 0.0124/0.0125         | 48                        | 22.47               |
| 6            | 36                            | 9494.6                    | 05/075               | 5.95               | 384/384              | 0.0155/0.0151         | 70                        | 37.58               |
| 7            | 36                            | 5340.7                    | 05/075               | 4                  | 384/384              | 0.0104/0.0060         | 40                        | 21.21               |
| 8            | 36                            | 6646.2                    | 0.5/0.75             | 3.93               | 384/384              | 0.0102/0.0123         | 55                        | 26.35               |
| 9            | 36                            | 5934.1                    | 05/075               | 3.73               | 384/384              | 0.0097/0.0104         | 44                        | 23                  |
| 10           | 36                            | 5934.1                    | 05/075               | 3.73               | 384/384              | 0.0097/0.0104         | 44                        | 23                  |
| 11           | 36                            | 6646.2                    | 05/075               | 2.73               | 384/384              | 0.071/0.0112          | 56                        | 26.35               |
| 12           | 36                            | 5104.4                    | 0.6/0.85             | 4                  | 384/384              | 0.0104/0.0104         | 38                        | 20.24               |
